# Supplementary material for: Association of Black Race With Physical and Chemical Restraint Use Among Patients Undergoing Emergency Psychiatric Evaluation
Source: Atypon-hosted journal article supplement (doi:10.1176/appi.ps.202100474), 2021-12-21
Supplement: appi.ps.202100474.ds001.pdf [file appi.ps.202100474.ds001.pdf]

**Supplement 1. Demographic and Clinical Characteristics of Patients Receiving an Emergency Psychiatry consult stratified by race**

| Characteristic                        | Overall<br>(12,977) |                | Black<br>(N=6,287) |                | White<br>(N=5,263) |                |
|---------------------------------------|---------------------|----------------|--------------------|----------------|--------------------|----------------|
|                                       | Median              | IQR            | Median             | IQR            | Median             | IQR            |
| Age, median (IQR), years              | 37.0                | 27.0, 52.0     | 36.0               | 26.0, 49.0     | 42.0               | 29.0, 56.0     |
| Height, median (IQR), In <sup>b</sup> | 67.0                | 64.0, 70.0     | 67.0               | 64.4, 70.0     | 67.0               | 64.0, 70.2     |
|                                       | N                   | % <sup>a</sup> | N                  | % <sup>a</sup> | N                  | % <sup>a</sup> |
| Sex                                   |                     |                |                    |                |                    |                |
| Female                                | 5,816               | 44.8           | 2,606              | 41.5           | 2,493              | 47.4           |
| Male                                  | 7,159               | 55.2           | 3,681              | 58.5           | 2,770              | 52.6           |
| Missing                               | 2                   | 0.0            | 0                  | 0.0            | 0                  | 0.0            |
| Ethnicity                             |                     |                |                    |                |                    |                |
| Hispanic                              | 566                 | 4.4            | 20                 | 0.3            | 96                 | 1.8            |
| Non-Hispanic                          | 12,137              | 93.5           | 6,215              | 98.9           | 5,072              | 96.4           |
| Unreported                            | 266                 | 2.0            | 51                 | 0.8            | 95                 | 1.8            |
| Missing                               | 8                   | 0.1            | 1                  | 0.0            | 0                  | 0.0            |
| Shift                                 |                     |                |                    |                |                    |                |
| 12:00am – 3:59am                      | 1,620               | 12.5           | 944                | 15.0           | 516                | 9.8            |
| 4:00am – 7:59am                       | 782                 | 6.0            | 459                | 7.3            | 250                | 4.8            |
| 8:00am – 11:59am                      | 1,640               | 12.6           | 808                | 12.9           | 663                | 12.6           |
| 12:00pm – 3:59pm                      | 2,881               | 22.2           | 1,276              | 20.3           | 1,280              | 24.3           |
| 4:00pm – 7:59pm                       | 3,141               | 24.2           | 1,378              | 21.9           | 1,402              | 26.6           |
| 8pm – 11:59pm                         | 2,911               | 22.4           | 1,422              | 22.6           | 1,152              | 21.9           |
| Diagnosis                             |                     |                |                    |                |                    |                |
| Bipolar disorder                      | 2,045               | 15.8           | 900                | 14.3           | 937                | 17.8           |
| Psychotic disorder                    | 4,383               | 33.8           | 2,719              | 43.2           | 1,174              | 22.3           |
| Missing                               | 225                 | 1.7            | 102                | 1.6            | 93                 | 1.8            |
|                                       | No./no. total       | %              | No./no. total      | %              | No./no. total      | %              |
| Laboratory tests <sup>c</sup>         |                     |                |                    |                |                    |                |

|                                |                 |      |                 |      |               |      |
|--------------------------------|-----------------|------|-----------------|------|---------------|------|
| Amphetamine                    | 320/<br>8,358   | 3.8  | 53/<br>3,989    | 1.3  | 232/<br>3,507 | 6.6  |
| THC                            | 2,239/<br>8,351 | 26.8 | 1,320/<br>3,987 | 33.1 | 720/<br>3,502 | 20.6 |
| Cocaine                        | 1,646/<br>8,361 | 19.7 | 1,081/<br>3,989 | 27.1 | 466/<br>3,510 | 13.3 |
| Opiate                         | 552/<br>8,359   | 6.6  | 180/<br>3,989   | 4.5  | 334/<br>3,508 | 9.5  |
| Peak ethanol level<br>≥80mg/dl | 1,063/<br>8,138 | 13.1 | 424/<br>3,897   | 10.9 | 530/<br>3,404 | 15.6 |

<sup>a</sup>Denotes column percentages.

<sup>b</sup>Height was missing from 2,019 (15.6%) encounters.

<sup>c</sup>Amphetamine screen was not obtained in 4,619 (35.6%) encounters; THC screen was not obtained in 4,626 (35.6%) encounters; Cocaine screen was not obtained in 4616 (35.6%) encounters; Opiate screen was not obtained in 4618 (35.6%) encounters; Blood alcohol level was not obtained in 4,839 (37.3%) encounters.

**Supplement. Crude and Adjusted Odds of Receiving Physical restraint by variable**

| Characteristic                      | Crude OR | 95% CI    | Adjusted OR | Robust 95% CI |
|-------------------------------------|----------|-----------|-------------|---------------|
| Age (reference: 18-20)              |          |           |             |               |
| 20-40                               | 2.01     | 1.44-2.81 | 1.00        | .64-1.57      |
| 40-60                               | .99      | .70-1.41  | .53         | .32-.86       |
| 60-80                               | .90      | .60-1.35  | .40         | .21-.73       |
| 80-100                              | .82      | .36-1.87  | .95         | .31-2.91      |
| Height                              | 1.02     | 1.00-1.04 | 1.03        | 1.00-1.06     |
| Sex (reference: female)             |          |           |             |               |
| Male                                | 1.23     | 1.08-1.41 | .96         | .74-1.25      |
| Race (reference: white)             |          |           |             |               |
| Asian                               | 1.03     | .58-1.83  | .58         | .21-1.64      |
| Black                               | 1.67     | 1.44-1.94 | 1.35        | 1.07-1.72     |
| Multiracial                         | 2.09     | 1.60-2.75 | 1.84        | 1.20-2.80     |
| Other                               | 1.39     | .90-2.15  | 1.32        | .65-2.65      |
| Unreported                          | 2.09     | 1.28-3.42 | .84         | .29-2.43      |
| Ethnicity (reference: non-Hispanic) |          |           |             |               |
| Hispanic                            | .89      | .61-1.30  | .82         | .46-1.47      |
| Unreported                          | 1.18     | .77-1.82  | 1.05        | .50-2.23      |

|                                        |      |           |      |           |
|----------------------------------------|------|-----------|------|-----------|
| Shift (reference:<br>12:00am – 3:59am) |      |           |      |           |
| 4:00am –<br>7:59am                     | 1.34 | .99-1.82  | 2.03 | 1.30-3.17 |
| 8:00am –<br>11:59am                    | 1.28 | 1.00-1.65 | 1.57 | 1.05-2.34 |
| 12:00pm –<br>3:59pm                    | 1.18 | .94-1.49  | 1.51 | 1.06-2.17 |
| 4:00pm –<br>7:59pm                     | .92  | .73-1.16  | .96  | .66-1.40  |
| 8:00pm –<br>11:59pm                    | .78  | .61-1.00  | .79  | .54-1.15  |
| Urine drug screen                      |      |           |      |           |
| Amphetamine                            | .76  | .46-1.24  | .69  | .38-1.27  |
| THC                                    | 2.11 | 1.77-2.52 | 1.75 | 1.42-2.17 |
| Cocaine                                | .88  | .69-1.13  | .68  | .51-.91   |
| Opiates                                | .85  | .59-1.23  | 1.19 | .77-1.85  |
| Peak ethanol level<br>≥80mg/dl         | .69  | .52-.91   | 1.38 | .98-1.95  |
| Diagnosis                              |      |           |      |           |
| Psychotic<br>disorder                  | 2.32 | 2.03-2.64 | 2.30 | 1.87-2.84 |
| Bipolar<br>disorder                    | 1.91 | 1.64-2.23 | 2.37 | 1.89-2.97 |

**Supplement. Crude and Adjusted Odds of Receiving Chemical restraint by variable**

| <b>Characteristic</b>      | <b>Crude<br/>OR</b> | <b>95% CI</b> | <b>Adjusted<br/>OR</b> | <b>Robust<br/>95% CI</b> |
|----------------------------|---------------------|---------------|------------------------|--------------------------|
| Age (reference: 18-<br>20) |                     |               |                        |                          |
| 20-40                      | 2.12                | 1.64-2.73     | 1.24                   | .89-1.71                 |
| 40-60                      | 1.55                | 1.19-2.00     | 1.01                   | .72-1.42                 |
| 60-80                      | 1.59                | 1.19-2.11     | .89                    | .60-1.31                 |
| 80-100                     | 1.82                | 1.12-2.96     | 1.63                   | .81-3.28                 |
| Height                     | 1.02                | 1.00-1.04     | 1.01                   | .99-1.03                 |
| Sex (reference:<br>female) |                     |               |                        |                          |
| Male                       | 1.31                | 1.19-1.44     | 1.24                   | 1.04-1.49                |
| Race (reference:<br>white) |                     |               |                        |                          |
| Asian                      | 1.13                | .77-1.66      | 1.10                   | .66-1.84                 |
| Black                      | 1.57                | 1.42-1.75     | 1.33                   | 1.15-1.55                |
| Multiracial                | 1.84                | 1.50-2.26     | 2.11                   | 1.56-2.84                |

|                                        |      |           |      |           |
|----------------------------------------|------|-----------|------|-----------|
| Other                                  | 1.23 | .90-1.69  | 1.52 | .94-2.46  |
| Unreported                             | 2.27 | 1.60-3.23 | 1.30 | .64-2.65  |
| Ethnicity (reference:<br>non-Hispanic) |      |           |      |           |
| Hispanic                               | .72  | .55-0.93  | .73  | .48-1.10  |
| Unreported                             | 1.19 | .87-1.64  | .92  | .55-1.53  |
| Shift (reference:<br>12:00am – 3:59am) |      |           |      |           |
| 4:00am –<br>7:59am                     | 1.11 | .89-1.40  | 1.09 | .80-1.50  |
| 8:00am –<br>11:59am                    | 1.03 | .86-1.24  | 1.04 | .80-1.36  |
| 12:00pm –<br>3:59pm                    | 1.11 | .94-1.31  | 1.18 | .94-1.49  |
| 4:00pm –<br>7:59pm                     | .87  | .74-1.03  | .85  | .67-1.07  |
| 8:00pm –<br>11:59pm                    | .84  | .71-.99   | .83  | .65-1.04  |
| Urine drug screen                      |      |           |      |           |
| Amphetamine                            | .83  | .60-1.13  | 1.02 | .71-1.47  |
| THC                                    | 1.68 | 1.49-1.90 | 1.53 | 1.32-1.78 |
| Cocaine                                | .87  | .75-1.01  | .80  | .67-.96   |
| Opiates                                | .92  | .73-1.17  | 1.28 | .97-1.70  |
| Peak ethanol level<br>>80mg/dl         | .96  | .81-1.15  | 1.41 | 1.14-1.74 |
| Diagnosis                              |      |           |      |           |
| Psychotic<br>disorder                  | 2.72 | 2.47-3.00 | 2.83 | 2.47-3.24 |
| Bipolar<br>disorder                    | 1.83 | 1.63-2.05 | 2.29 | 1.95-2.68 |

### Supplement. Sensitivity Analysis of Physical Restraints Using Multiple Imputation

| Characteristic             | Adjusted<br>OR | Robust<br>95% CI |
|----------------------------|----------------|------------------|
| Age (reference: 18-<br>20) |                |                  |
| 20-40                      | 1.59           | 1.13-2.24        |
| 40-60                      | .93            | .64-1.33         |
| 60-80                      | .86            | .56-1.33         |
| 80-100                     | 1.08           | .46-2.52         |
| Height                     | 1.00           | .97-1.02         |
| Sex (reference:<br>female) |                |                  |

|                                        |      |           |
|----------------------------------------|------|-----------|
| Male                                   | 1.14 | .95-1.38  |
| Race (reference:<br>white)             |      |           |
| Asian                                  | .90  | .50-1.60  |
| Black                                  | 1.28 | 1.09-1.51 |
| Multiracial                            | 1.95 | 1.45-2.62 |
| Other                                  | 1.53 | .97-2.42  |
| Unreported                             | 1.58 | .90-2.76  |
| Ethnicity (reference:<br>non-Hispanic) |      |           |
| Hispanic                               | .63  | .42-.95   |
| Unreported                             | 1.00 | .61-1.67  |
| Shift (reference:<br>12:00am – 3:59am) |      |           |
| 4:00am –<br>7:59am                     | 1.32 | .97-1.80  |
| 8:00am –<br>11:59am                    | 1.32 | 1.02-1.72 |
| 12:00pm –<br>3:59pm                    | 1.26 | 1.00-1.60 |
| 4:00pm –<br>7:59pm                     | .95  | .74-1.21  |
| 8:00pm –<br>11:59pm                    | .77  | .60-.99   |
| Urine drug screen                      |      |           |
| Amphetamine                            | .80  | .41-1.56  |
| THC                                    | 1.77 | 1.42-2.21 |
| Cocaine                                | .79  | .62-1.01  |
| Opiates                                | 1.08 | .74-1.75  |
| Peak ethanol level<br>≥80mg/dl         | 1.06 | .80-1.42  |
| Diagnosis                              |      |           |
| Psychotic<br>disorder                  | 2.17 | 1.88-2.50 |
| Bipolar<br>disorder                    | 2.00 | 1.71-2.35 |

**Supplement. Sensitivity Analysis of Chemical Restraints by Multiple Imputation**

| Characteristic | Adjusted<br>OR | Robust<br>95% CI |
|----------------|----------------|------------------|
|----------------|----------------|------------------|

|                                     |      |           |
|-------------------------------------|------|-----------|
| Age (reference: 18-20)              |      |           |
| 20-40                               | 1.58 | 1.22-2.05 |
| 40-60                               | 1.33 | 1.01-1.74 |
| 60-80                               | 1.42 | 1.05-1.91 |
| 80-100                              | 2.33 | 1.40-3.89 |
| Height                              | 1.00 | .98-1.02  |
| Sex (reference: female)             |      |           |
| Male                                | 1.24 | 1.08-1.42 |
| Race (reference: white)             |      |           |
| Asian                               | 1.12 | .76-1.64  |
| Black                               | 1.26 | 1.12-1.41 |
| Multiracial                         | 1.92 | 1.53-2.42 |
| Other                               | 1.57 | 1.10-2.22 |
| Unreported                          | 2.01 | 1.33-3.03 |
| Ethnicity (reference: non-Hispanic) |      |           |
| Hispanic                            | .56  | .41-.76   |
| Unreported                          | 1.00 | .70-1.44  |
| Shift (reference: 12am- 4am)        |      |           |
| 4:00am – 7:59am                     | 1.09 | .86-1.39  |
| 8:00am – 11:59am                    | 1.04 | .85-1.26  |
| 12:00pm – 3:59pm                    | 1.16 | .98-1.38  |
| 4:00pm – 7:59pm                     | .88  | .74-1.05  |
| 8:00pm – 11:59pm                    | .82  | .69-.98   |
| Urine drug screen                   |      |           |
| Amphetamine                         | .85  | .55-1.31  |
| THC                                 | 1.58 | 1.36-1.83 |
| Cocaine                             | .80  | .67-.96   |
| Opiates                             | 1.22 | .92-1.60  |
| Peak ethanol level ≥80mg/dl         | 1.43 | 1.19-1.72 |
| Diagnosis                           |      |           |
| Psychotic disorder                  | 2.68 | 2.42-2.97 |
| Bipolar disorder                    | 2.02 | 1.79-2.28 |
